# Supplementary material for: Validation of the WRF-ARW Eclipse Model with Measurements from the 2019 & 2020 Total Solar Eclipses
Source: Copernicus journal article supplement (doi:10.5194/egusphere-2023-283), 2023-04-24
Supplement: Supplementary file 1 [file S1.pdf › S1.pdf]

```

&time_control
run_days           = 0,
run_hours          = 0,
run_minutes        = 0,
run_seconds        = 0,
start_year         = 2019, 2019, 2019,
start_month        = 07, 07, 07,
start_day          = 02, 02, 02,
start_hour         = 00, 00, 00,
end_year           = 2019, 2019, 2019,
end_month          = 07, 07, 07,
end_day            = 04, 04, 04,
end_hour           = 00, 00, 00,
interval_seconds   = 10800
input_from_file    = .true.,.true.,.true.,
history_interval   = 60, 60, 30,
history_outname     = 'wrfout_d<domain>_<date>'
frames_per_outfile = 1, 1, 1,
restart            = .false.,
restart_interval   = 360,
io_form_history     = 2
io_form_restart    = 2
io_form_input       = 2
io_form_boundary   = 2
/

```

```

&domains
time_step          = 45,
time_step_fract_num = 0,
time_step_fract_den = 1,
max_dom            = 3,
e_we               = 253, 253, 253
e_sn               = 253, 253, 253
e_vert             = 50, 50, 50,
p_top_requested    = 5000,
num_metgrid_levels = 34,
num_metgrid_soil_levels = 4,
dx                 = 9000,
dy                 = 9000,
grid_id            = 1, 2, 3,
parent_id          = 0, 1, 2,
i_parent_start     = 1, 86, 86
j_parent_start     = 1, 86, 86
parent_grid_ratio   = 1, 3, 3,
parent_time_step_ratio = 1, 3, 3,
feedback           = 1,
smooth_option      = 1
/

```

```

&physics

```

```

! physics_suite
mp_physics
ra_lw_physics
ra_sw_physics
radt
sf_sfclay_physics
sf_surface_physics
bl_pbl_physics
bldt
cu_physics
cudt
!isfflx
!ifsnow
icloud
surface_input_source
num_soil_layers
num_land_cat
sf_urban_physics
ra_sw_eclipse
/

```

```

= 'CONUS'
= 8,      8,      8,
= 4,      4,      4,
= 4,      4,      4,
= 1,      1,      1,
= 1,      1,      1,
= 2,      2,      2,
= 1,      1,      1,
= 0,      0,      0,
= 5,      0,      0,
= 0,      0,      0,
= 1,
= 1,
= 0,
= 1,
= 4,
= 21,
= 0,      0,      0,
= 1,

```

```

&fdda
/

```

```

&dynamics
w_damping
diff_opt
km_opt
diff_6th_opt
diff_6th_factor
base_temp
damp_opt
zdamp
dampcoef
khdif
kvdif
non_hydrostatic
moist_adv_opt
scalar_adv_opt
gwd_opt
/

```

```

= 0,
= 1,      1,      1,
= 4,      4,      4,
= 0,      0,      0,
= 0.12,   0.12,   0.12,
= 290.
= 0,
= 5000.,   5000.,   5000.,
= 0.2,     0.2,     0.2
= 0,      0,      0,
= 0,      0,      0,
= .true., .true., .true.,
= 1,      1,      1,
= 1,      1,      1,
= 1,

```

```

&bdy_control
spec_bdy_width
spec_zone
relax_zone
specified
/

```

```

= 5,
= 1,
= 4,
= .true., .false.,.false.,

```

```

&grib2

```

/

```
&namelist_quilt  
nio_tasks_per_group = 0,  
nio_groups = 1,  
/
```
