# Supplementary material for: Validation of the WRF-ARW Eclipse Model with Measurements from the 2019 & 2020 Total Solar Eclipses
Source: Copernicus journal article supplement (doi:10.5194/egusphere-2023-283), 2023-04-24
Supplement: Supplementary file 3 [file S3.pdf › S3.pdf]

```

&time_control
run_days              = 0,
run_hours             = 0,
run_minutes           = 0,
run_seconds           = 0,
start_year            = 2020, 2020, 2020,
start_month           = 12, 12, 12,
start_day             = 13, 13, 13,
start_hour            = 00, 00, 00,
end_year              = 2020, 2020, 2020,
end_month             = 12, 12, 12,
end_day              = 16, 16, 16,
end_hour              = 00, 00, 00,
interval_seconds      = 10800
input_from_file       = .true.,.true.,.true.,
history_interval      = 60, 60, 30,
history_outname       = 'wrfout_d<domain>_<date>'
frames_per_outfile    = 1, 1, 1,
restart               = .false.,
restart_interval      = 360,
io_form_history       = 2
io_form_restart       = 2
io_form_input         = 2
io_form_boundary      = 2
/

```

```

&domains
time_step             = 45,
time_step_fract_num   = 0,
time_step_fract_den   = 1,
max_dom               = 3,
e_we                  = 253, 253, 253
e_sn                  = 253, 253, 253
e_vert                = 50, 50, 50,
p_top_requested       = 5000,
num_metgrid_levels    = 34,
num_metgrid_soil_levels = 4,
dx                    = 9000,
dy                    = 9000,
grid_id               = 1, 2, 3,
parent_id             = 0, 1, 2,
i_parent_start        = 1, 86, 86
j_parent_start        = 1, 86, 86
parent_grid_ratio      = 1, 3, 3,
parent_time_step_ratio = 1, 3, 3,
feedback              = 1,
smooth_option         = 1
/

```

```

&physics

```

```

! physics_suite
mp_physics
ra_lw_physics
ra_sw_physics
radt
sf_sfclay_physics
sf_surface_physics
bl_pbl_physics
bldt
cu_physics
cudt
!isfflx
!ifsnow
icloud
surface_input_source
num_soil_layers
num_land_cat
sf_urban_physics
ra_sw_eclipse
/

```

```

= 'CONUS'
= 8,      8,      8,
= 4,      4,      4,
= 4,      4,      4,
= 1,      1,      1,
= 1,      1,      1,
= 2,      2,      2,
= 1,      1,      1,
= 0,      0,      0,
= 5,      0,      0,
= 0,      0,      0,
= 1,
= 1,
= 1,
= 1,
= 4,
= 21,
= 0,      0,      0,
= 1,

```

```

&fdda
/

```

```

&dynamics
w_damping
diff_opt
km_opt
diff_6th_opt
diff_6th_factor
base_temp
damp_opt
zdamp
dampcoef
khdif
kvdif
non_hydrostatic
moist_adv_opt
scalar_adv_opt
gwd_opt
/

```

```

= 0,
= 1,      1,      1,
= 4,      4,      4,
= 0,      0,      0,
= 0.12,   0.12,   0.12,
= 290.
= 0,
= 5000.,   5000.,   5000.,
= 0.2,     0.2,     0.2
= 0,      0,      0,
= 0,      0,      0,
= .true., .true., .true.,
= 1,      1,      1,
= 1,      1,      1,
= 1,

```

```

&bdy_control
spec_bdy_width
spec_zone
relax_zone
specified
/

```

```

= 5,
= 1,
= 4,
= .true., .false.,.false.,

```

```

&grib2

```

/

```
&namelist_quilt  
nio_tasks_per_group = 0,  
nio_groups = 1,  
/
```
